# Supplementary material
Source: PubMed Central journal article supplement (PMC5714588)
Supplement: NIHMS921173-supplement-Supplemental.pdf [file NIHMS921173-supplement-Supplemental.pdf]

## SUPPLEMENTARY INFORMATION

Fig. S1. Examples of raw chromatograms for lipidomics, serum metabolomics and urine metabolomics.

Fig. S2. Weight and creatinine levels of control and irradiated mice from each group.

Fig. S3. Expanded multivariate data analysis and PCA score plots for days 1 and 7, including control groups.

Fig. S4. Metabolites identified through serum metabolomics. Metabolites that showed statistically significant changes between the equidose exposures at day 1 included l-tyrosine, uric acid, taurine, pyroglutamic acid, l-carnitine, sphinganine-1-phosphate and succinic acid. Only sphinganine-1-phosphate remained perturbed between the two equidose exposures at day 7. Control vs. 1 Gy neutron irradiated groups also showed statistical significance for l-tyrosine, l-glutamic acid, uric acid, taurine, citric acid, pyroglutamic acid and l-carnitine at day 1. Overall, a generalized downregulation of the metabolites is seen at day 1 after 1 Gy neutron irradiation, except for l-carnitine levels, which are higher.

Fig. S5. Metabolites from urine and serum metabolomics together with lipidomics, which were utilized for the construction of the ROC curves; and heatmap depiction of patterns of change between 1 Gy exposures at days 1 and 7 postirradiation.

Table S1. Chromatographic and mass spectrometry details on the experiments.

Table S2. Mean values of normalized relative abundance urine metabolomics data.

Table S3. Mean values of normalized relative abundance of serum metabolomics data.

Table S4. Mean values of normalized relative abundance of serum lipidomics data.

Table S5. AUC values of each metabolite from individual ROC curves.

# Supplementary Fig. S1

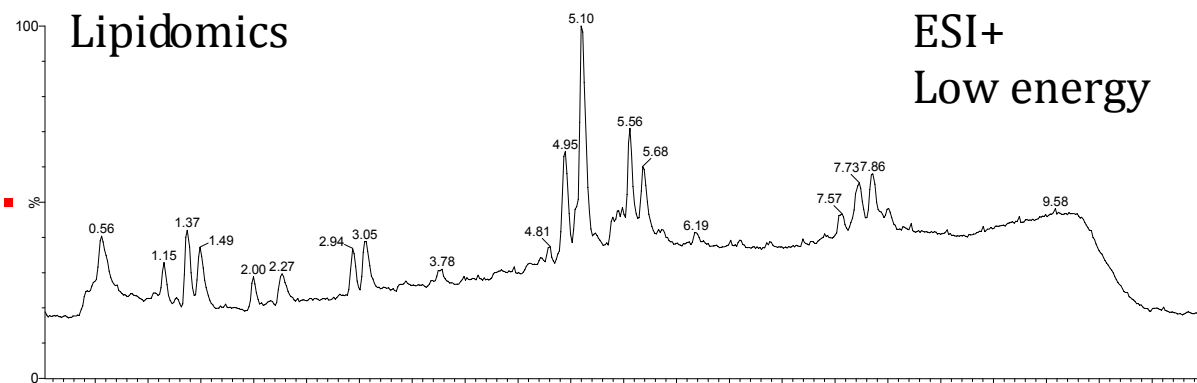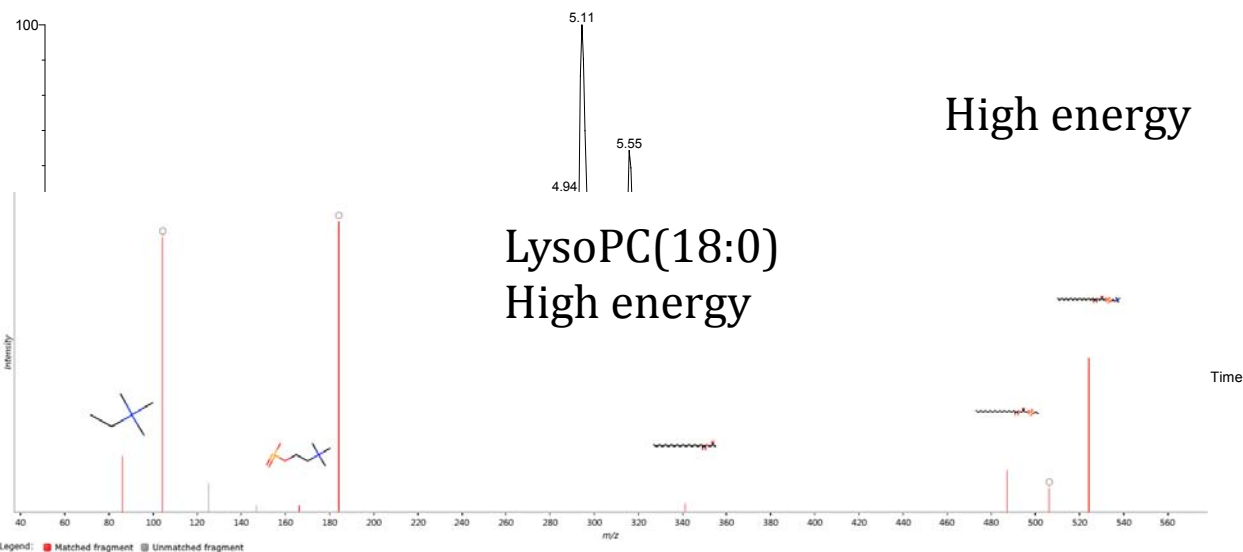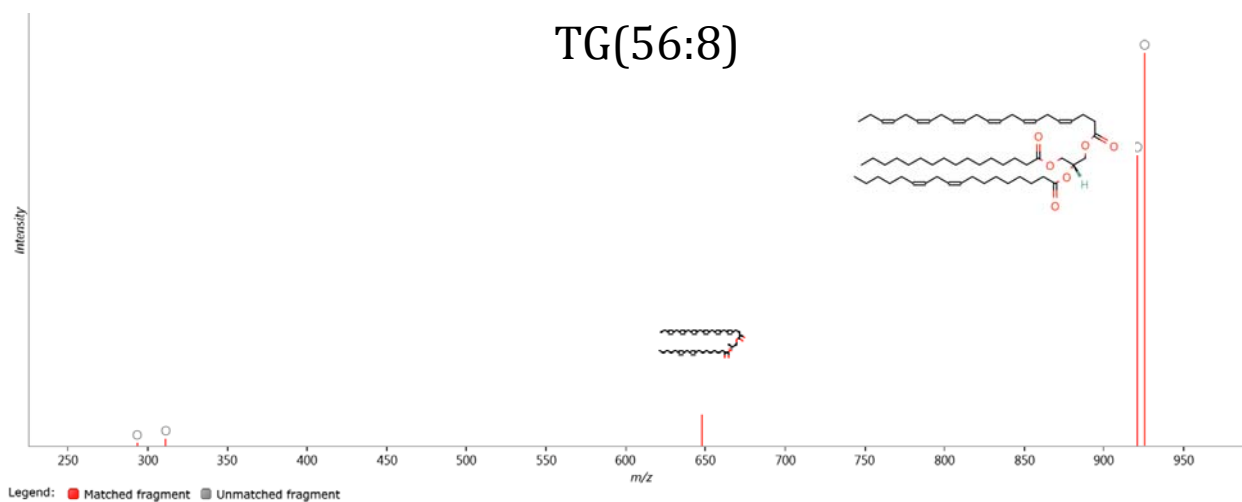

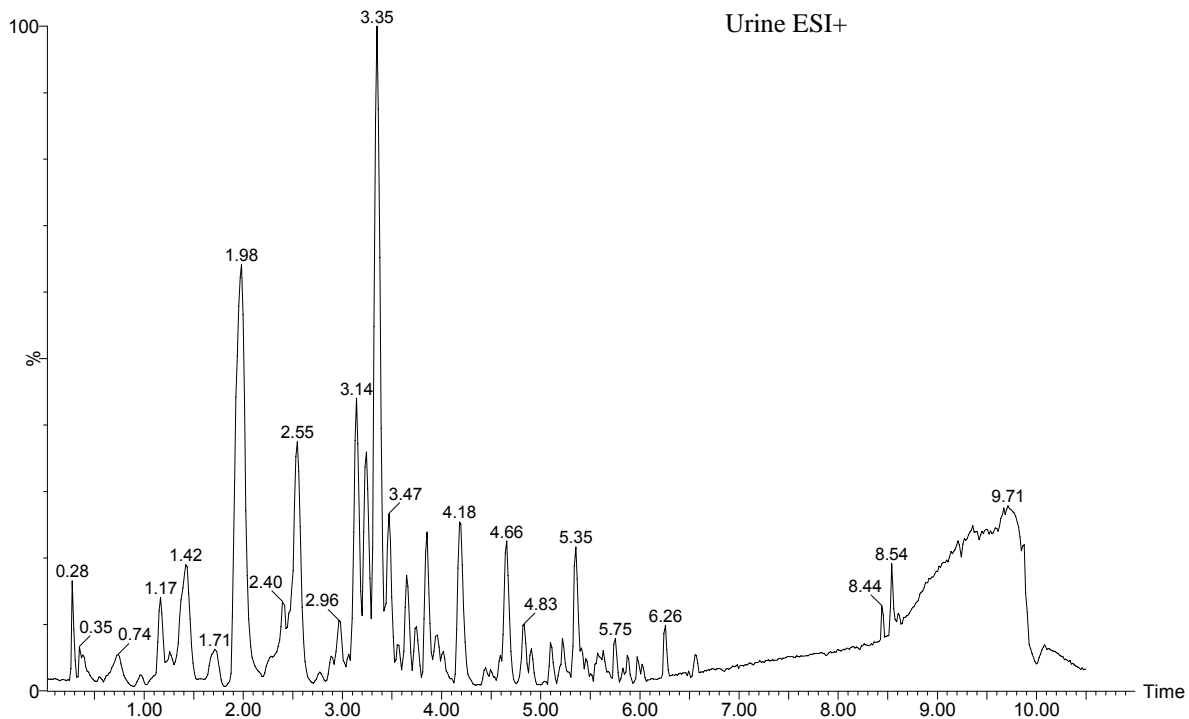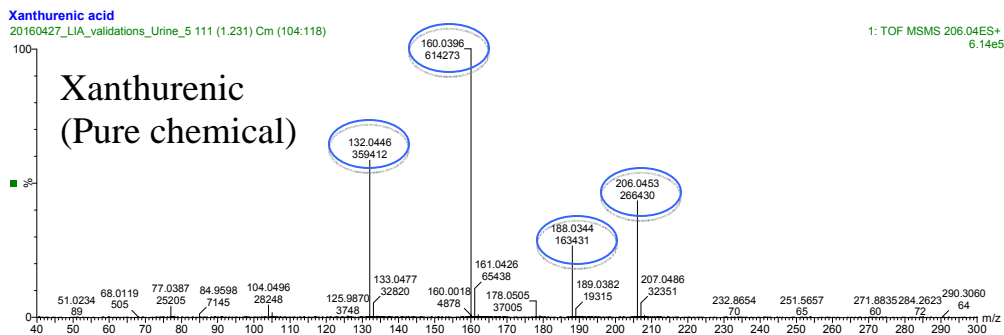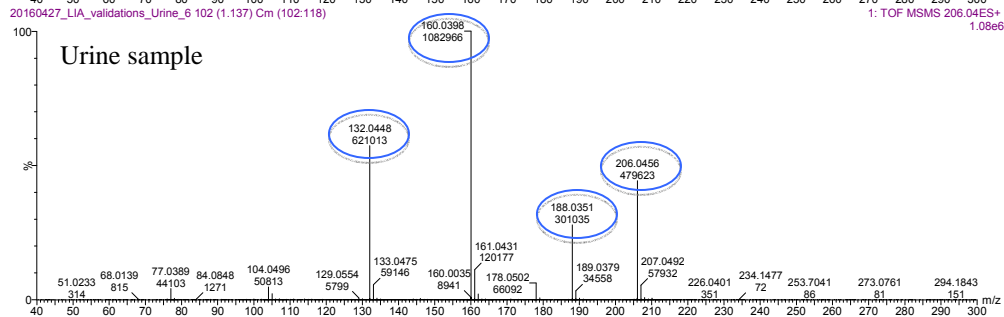

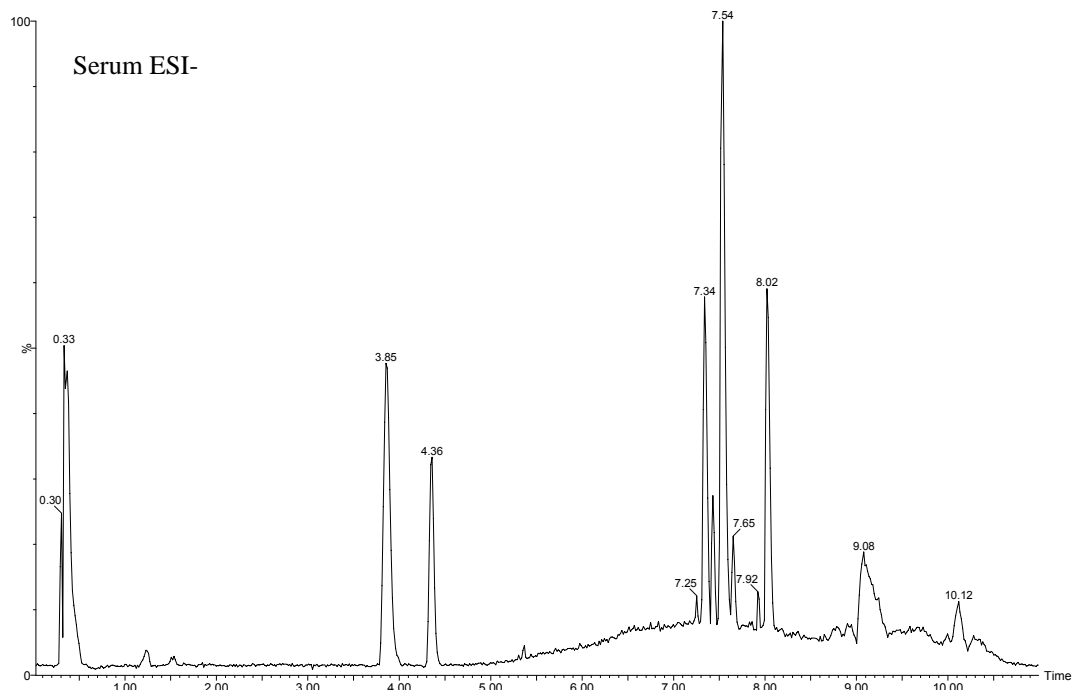

**Sphinganine-1-phosphate**

20160603\_LIA\_Validations\_47 641 (7.058) Cm (635:656)

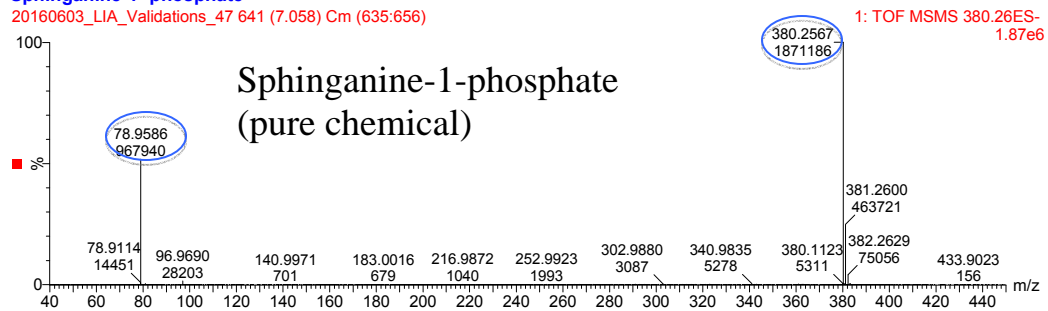

1: TOF MSMS 380.26ES-1.87e6

20160603\_LIA\_Validations\_48 641 (7.058) Cm (631:664)

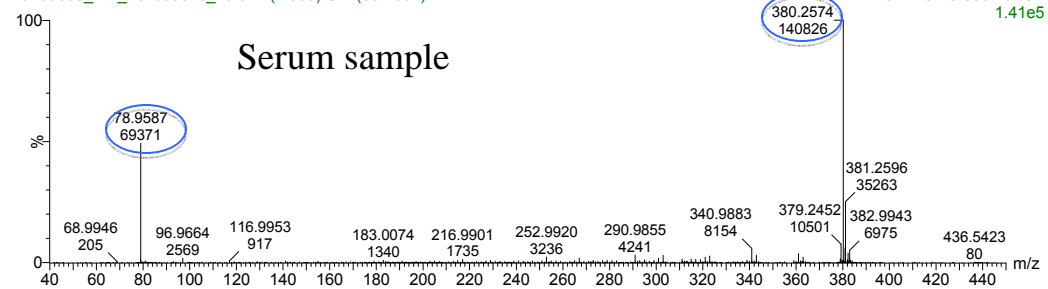

1: TOF MSMS 380.26ES-1.41e5



Arachidonic acid\_sample

20160427\_LIA\_Validations\_Serum\_23 753 (8.288) Cm (741:772)

1: TOF MSMS 305.25ES+  
4.33e4

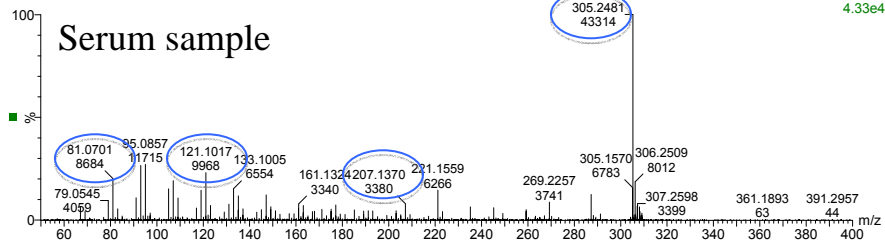

20160427\_LIA\_Validations\_Serum\_22 753 (8.288) Cm (742:789)

1: TOF MSMS 305.25ES+  
3.29e4

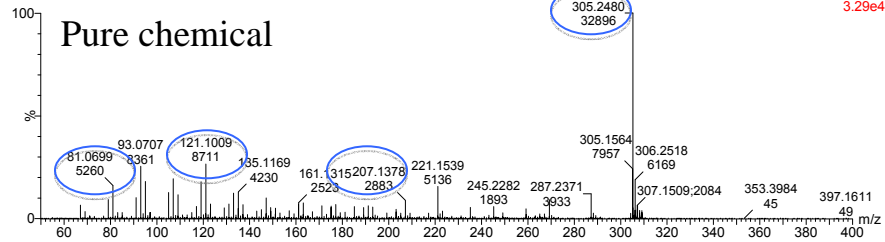

Zoom in

Arachidonic acid\_sample

20160427\_LIA\_Validations\_Serum\_23 753 (8.288) Cm (741:772)

1: TOF MSMS 305.25ES+  
1.17e4

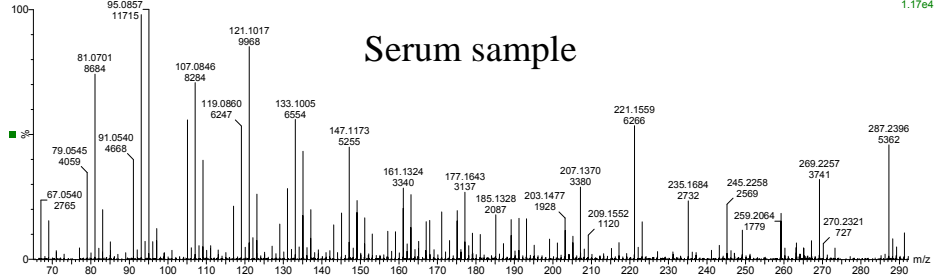

20160427\_LIA\_Validations\_Serum\_22 753 (8.288) Cm (742:789)

1: TOF MSMS 305.25ES+  
8.71e3

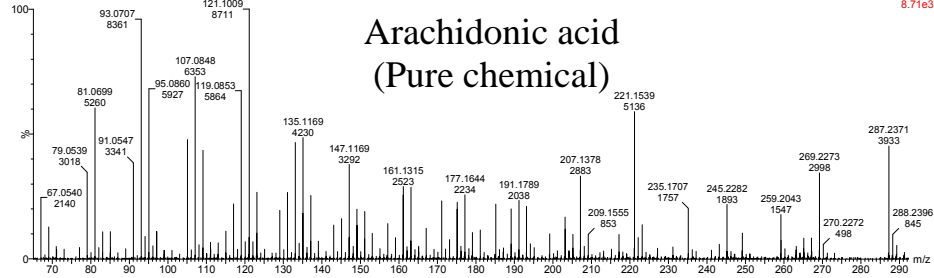

QC sample

20160603\_LIA\_Validations\_44 745 (8.353) Cm (737:753)

1: TOF MSMS 279.23ES-  
7.39e4

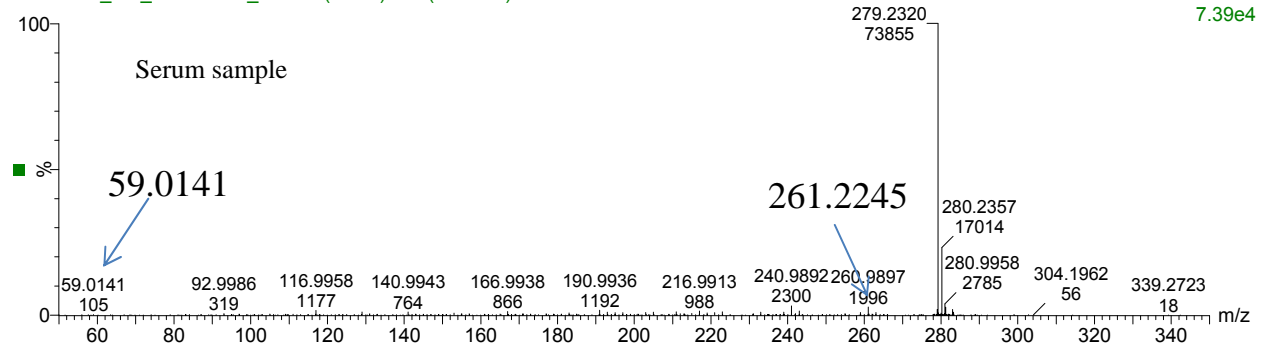

20160603\_LIA\_Validations\_43 745 (8.353) Cm (743:762)

1: TOF MSMS 279.23ES-  
1.96e5

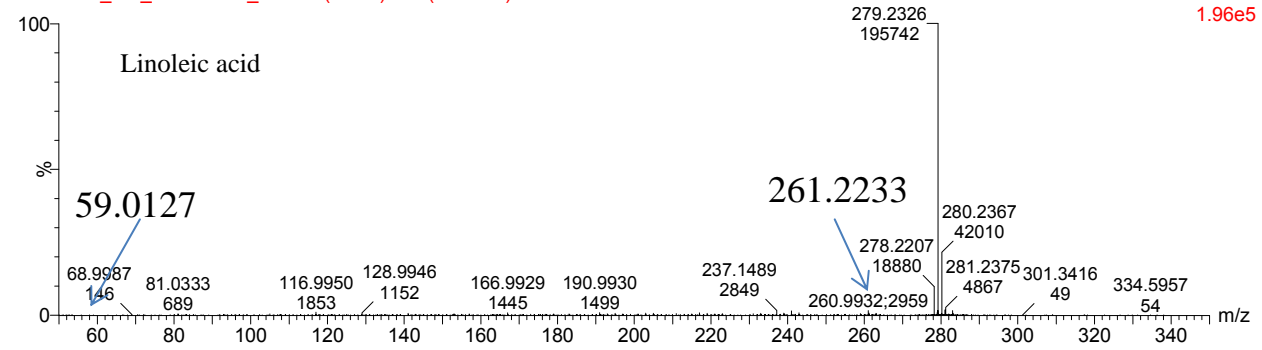

Supplementary Fig. S2

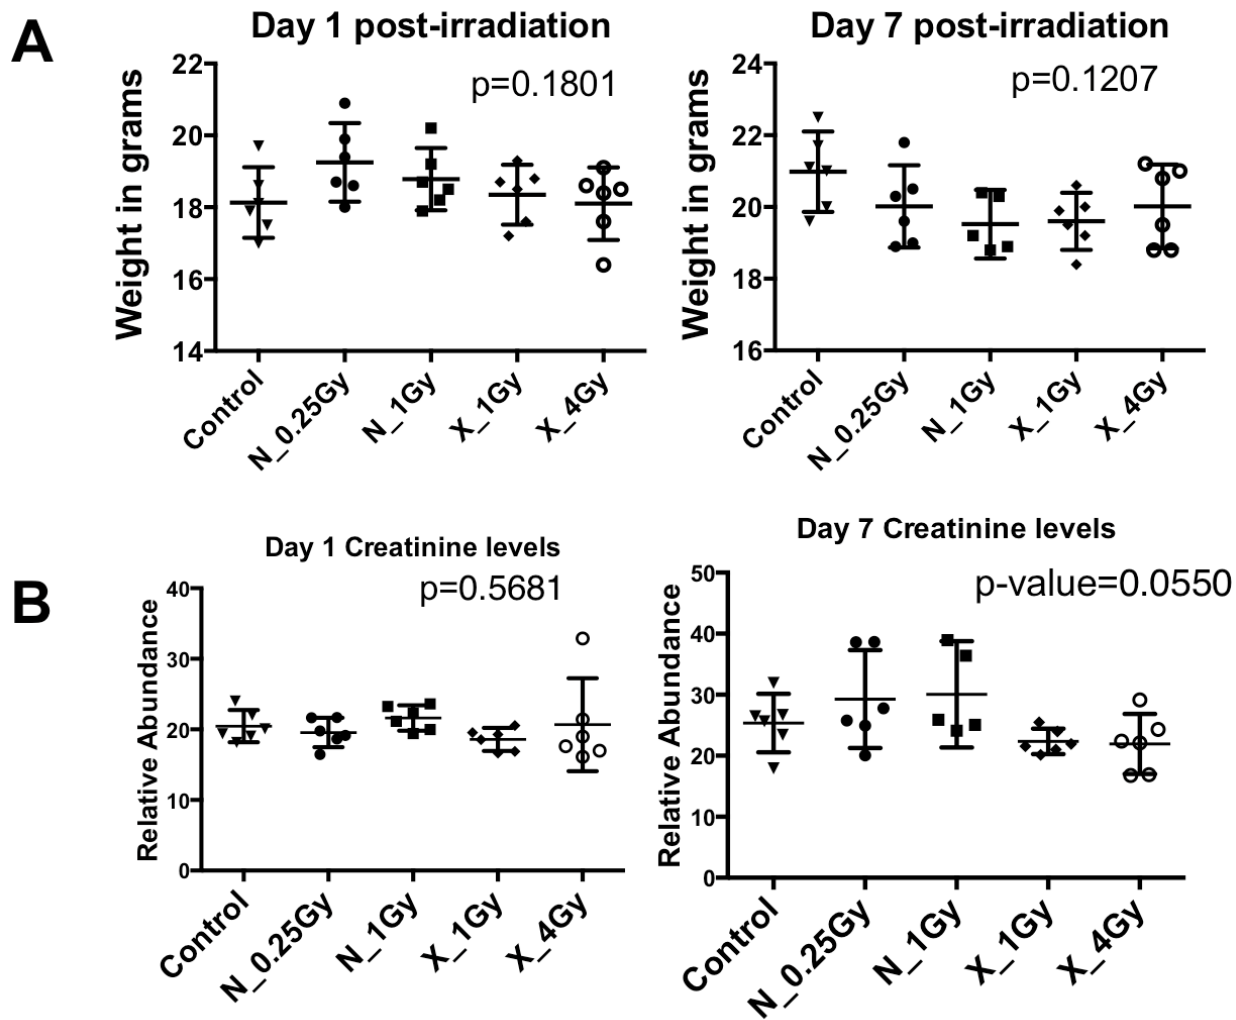



Supplementary Fig. S3

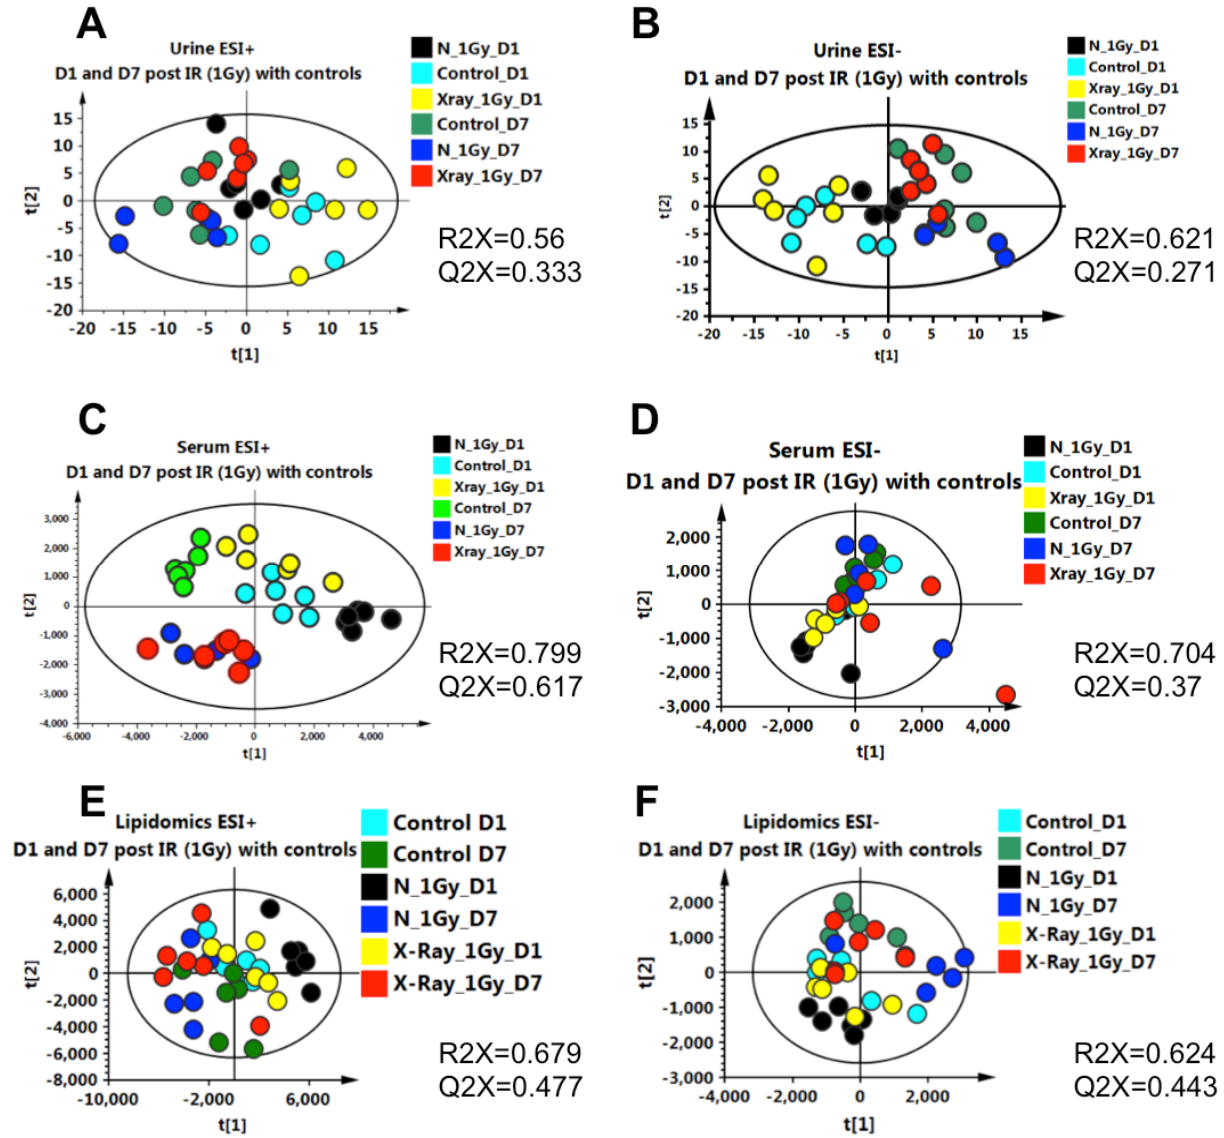

Supplementary Fig. S4

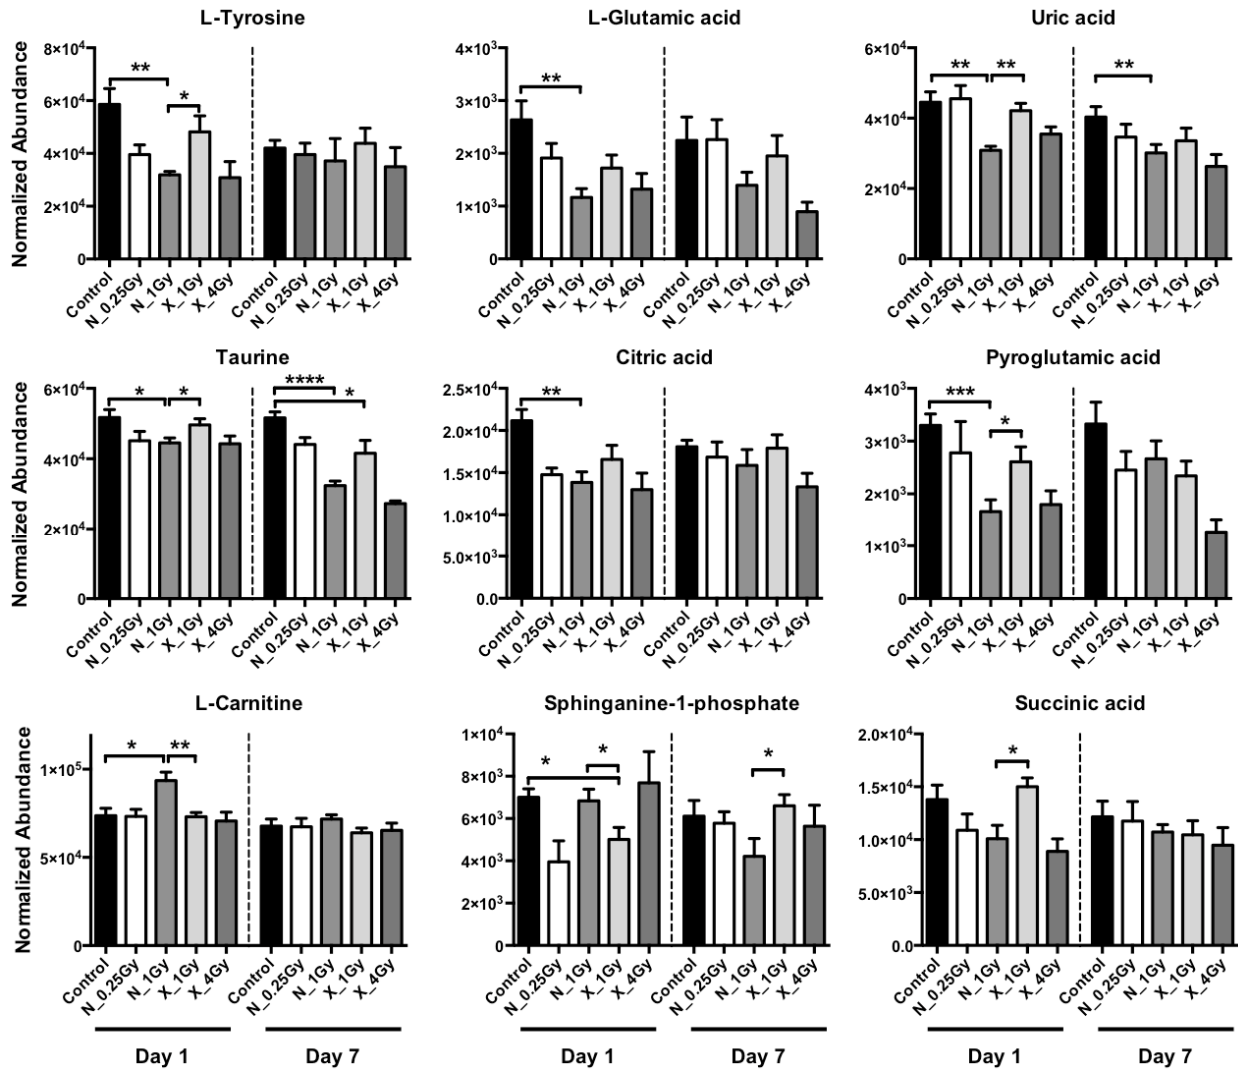

Supplementary Fig. S5

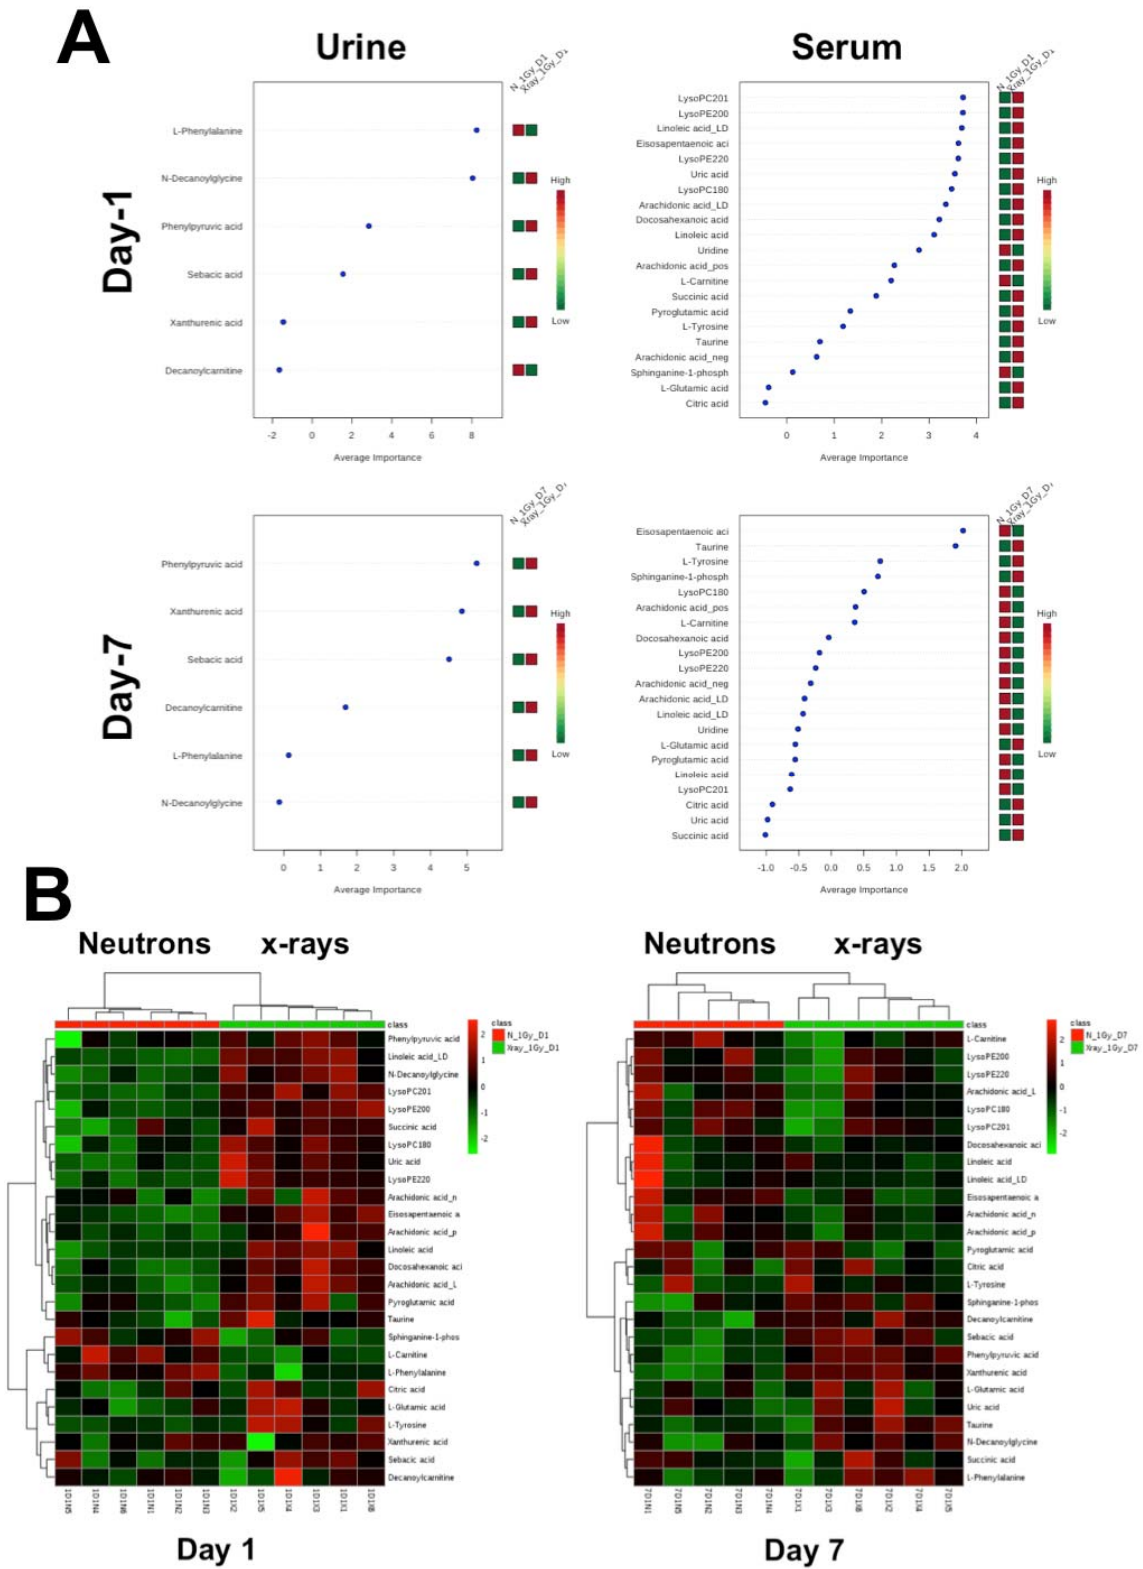

## Supplementary Table S1: Chromatographic and mass spectrometry details on the experiments.

### Chromatographic conditions for Global Urine Metabolomics

| Step | Time (min) | Flow (mL/min) | % A | % B | Curve Initial |
|------|------------|---------------|-----|-----|---------------|
| 1    | Initial    | 0.5           | 95  | 5   | Initial       |
| 2    | 0.5        | 0.5           | 95  | 5   | 6             |
| 3    | 4          | 0.5           | 80  | 20  | 6             |
| 4    | 8          | 0.5           | 5   | 95  | 6             |
| 5    | 9          | 0.5           | 5   | 95  | 6             |
| 6    | 9.1        | 0.5           | 95  | 5   | 6             |
| 7    | 10.5       | 0.5           | 95  | 5   | 6             |

Solvent A: Water + 0.1% Formic acid  
Solvent B: Acetonitrile + 0.1% Formic acid

### Chromatographic conditions for Global Serum Metabolomics

| Step | Time (min) | Flow (mL/min) | % A | % B | Curve Initial |
|------|------------|---------------|-----|-----|---------------|
| 1    | Initial    | 0.5           | 95  | 5   | Initial       |
| 2    | 0.5        | 0.5           | 95  | 5   | 6             |
| 3    | 4          | 0.5           | 80  | 20  | 6             |
| 4    | 8          | 0.5           | 5   | 95  | 6             |
| 5    | 9          | 0.5           | 5   | 95  | 6             |
| 6    | 9.5        | 0.5           | 95  | 5   | 6             |
| 7    | 11         | 0.5           | 95  | 5   | 6             |

Solvent A: Water + 0.1% Formic acid  
Solvent B: Acetonitrile + 0.1% Formic acid

### Chromatographic conditions for Global Lipidomics

| Step | Time (min) | Flow (mL/min) | % C | % D | Curve Initial |
|------|------------|---------------|-----|-----|---------------|
| 1    | Initial    | 0.45          | 60  | 40  | Initial       |
| 2    | 0.5        | 0.45          | 60  | 40  | 6             |
| 3    | 8          | 0.45          | 0   | 100 | 6             |
| 4    | 8.5        | 0.45          | 0   | 100 | 6             |
| 5    | 9          | 0.45          | 60  | 40  | 6             |
| 6    | 11         | 0.45          | 60  | 40  | 6             |

Solvent C: 50:50 Water:Acetonitrile +0.1% Formic acid + 10mM HCOONH<sub>4</sub>  
Solvent D: 90:10 Isopropanol:Acetonitrile + 0.1% Formic acid + 10mM HCOONH<sub>4</sub>

### Other parameteres

| Instrument  | Parameter                     | Urine Metabolomics | Serum Metabolomics | Lipidomics |
|-------------|-------------------------------|--------------------|--------------------|------------|
| Autosampler | Injection volume $\mu$ L      | 2                  | 2                  | 2          |
| Column Oven | Temperature $^{\circ}$ C      | 40                 | 60                 | 65         |
| MS          | Capillary Voltage kV          | 2.5                | 2.5                | 2.8        |
|             | Cone Voltage V                | 50                 | 50                 | 30         |
|             | Source Temp $^{\circ}$ C      | 120                | 120                | 120        |
|             | Desolvation Temp $^{\circ}$ C | 500                | 500                | 500        |
|             | Cone Gas Flow (L/Hr)          | 25                 | 25                 | 25         |
|             | Desolvation Gas (L/Hr)        | 1000               | 1000               | 1000       |
|             | Collision Energy V            | 6                  | 6                  | 6          |

**Supplementary Table S2:** Mean values of normalized relative abundance urine metabolomics data.

| Metabolite         | Day 7   |       |          |       |       |       |           |       |           |       |               |
|--------------------|---------|-------|----------|-------|-------|-------|-----------|-------|-----------|-------|---------------|
|                    | Control | SEM   | N_0.25Gy | SEM   | N_1Gy | SEM   | x-ray_1Gy | SEM   | x-ray_4Gy | SEM   | ANOVA p-value |
| L-Phenylalanine    | 0.068   | 0.006 | 0.068    | 0.013 | 0.089 | 0.004 | 0.059     | 0.006 | 0.041     | 0.015 | 0.0072        |
| Phenylpyruvic acid | 0.160   | 0.010 | 0.169    | 0.014 | 0.121 | 0.020 | 0.178     | 0.013 | 0.165     | 0.024 | 0.1843        |
| Xanthurenic acid   | 1.476   | 0.117 | 1.771    | 0.054 | 1.571 | 0.115 | 1.552     | 0.201 | 1.924     | 0.278 | 0.356         |
| N-Decanoylglycine  | 0.087   | 0.013 | 0.054    | 0.008 | 0.028 | 0.007 | 0.098     | 0.011 | 0.080     | 0.022 | 0.0067        |
| Decanoylcarnitine  | 0.016   | 0.004 | 0.024    | 0.004 | 0.020 | 0.001 | 0.021     | 0.003 | 0.017     | 0.004 | 0.5054        |
| Sebacic acid       | 0.603   | 0.101 | 0.571    | 0.087 | 0.599 | 0.184 | 0.758     | 0.117 | 0.742     | 0.162 | 0.4958        |

  

| Metabolite         | Day 7   |       |          |       |       |       |           |       |           |       |               |
|--------------------|---------|-------|----------|-------|-------|-------|-----------|-------|-----------|-------|---------------|
|                    | Control | SEM   | N_0.25Gy | SEM   | N_1Gy | SEM   | x-ray_1Gy | SEM   | x-ray_4Gy | SEM   | ANOVA p-value |
| L-Phenylalanine    | 0.106   | 0.013 | 0.083    | 0.014 | 0.101 | 0.013 | 0.131     | 0.022 | 0.111     | 0.010 | 0.2556        |
| Phenylpyruvic acid | 0.090   | 0.021 | 0.106    | 0.017 | 0.107 | 0.014 | 0.208     | 0.012 | 0.274     | 0.025 | <0.0001       |
| Xanthurenic acid   | 1.343   | 0.123 | 1.355    | 0.281 | 0.958 | 0.179 | 1.954     | 0.105 | 1.586     | 0.201 | 0.0204        |
| N-Decanoylglycine  | 0.034   | 0.010 | 0.030    | 0.010 | 0.028 | 0.012 | 0.050     | 0.007 | 0.060     | 0.009 | 0.1073        |
| Decanoylcarnitine  | 0.022   | 0.002 | 0.015    | 0.004 | 0.016 | 0.003 | 0.025     | 0.002 | 0.022     | 0.003 | 0.1312        |
| Sebacic acid       | 0.299   | 0.104 | 0.228    | 0.089 | 0.155 | 0.036 | 0.384     | 0.097 | 0.351     | 0.136 | 0.1494        |

**Supplementary Table S3: Mean values of normalized relative abundance of serum metabolomics data.**

| Day 1                   |          |         |          |         |          |         |           |         |           |         |               |
|-------------------------|----------|---------|----------|---------|----------|---------|-----------|---------|-----------|---------|---------------|
| Metabolite              | Control  | SEM     | N_0.25Gy | SEM     | N_1Gy    | SEM     | x-ray_1Gy | SEM     | x-ray_4Gy | SEM     | ANOVA p-value |
| L-Tyrosine              | 58550.50 | 6012.39 | 39485.29 | 3701.88 | 31902.34 | 1291.87 | 48169.42  | 6045.82 | 30863.71  | 6053.79 | 0.0027        |
| L-Glutamic acid         | 2634.62  | 359.66  | 1911.09  | 276.02  | 1163.41  | 168.24  | 1722.78   | 246.28  | 1322.91   | 295.81  | 0.0081        |
| Taurine                 | 51710.40 | 2271.59 | 45146.03 | 2641.91 | 44513.84 | 1419.72 | 49627.45  | 1762.81 | 44209.53  | 2214.84 | 0.0589        |
| Succinic acid           | 13785.22 | 1375.16 | 10899.12 | 1523.78 | 10092.03 | 1273.85 | 15011.19  | 836.10  | 8888.91   | 1192.17 | 0.0103        |
| L-Carnitine             | 73673.91 | 4143.59 | 73281.80 | 4005.70 | 93535.49 | 4779.13 | 73006.85  | 2486.55 | 70613.88  | 5008.89 | 0.0039        |
| Pyroglutamic acid       | 3298.57  | 215.73  | 2778.25  | 592.43  | 1664.90  | 222.19  | 2609.38   | 282.56  | 1798.25   | 259.58  | 0.0124        |
| Eisosapentaenoic acid   | 3364.37  | 171.97  | 3036.26  | 680.23  | 995.95   | 264.76  | 3702.40   | 382.99  | 2597.29   | 232.66  | 0.0005        |
| Linoleic acid           | 4719.98  | 974.12  | 3988.15  | 1301.36 | 984.07   | 207.35  | 3160.32   | 452.34  | 3109.29   | 886.56  | 0.0556        |
| Arachidonic acid_neg    | 13161.06 | 1376.36 | 12475.65 | 1059.25 | 8501.81  | 786.83  | 11021.83  | 1311.47 | 9584.38   | 506.93  | 0.0248        |
| Arachidonic acid_pos    | 27450.37 | 1194.02 | 26474.13 | 933.46  | 19702.77 | 571.15  | 25207.13  | 1749.77 | 24988.73  | 668.90  | 0.0005        |
| Uric acid               | 44507.15 | 2985.00 | 45528.37 | 3744.36 | 30891.36 | 1115.49 | 42132.87  | 2086.64 | 35463.01  | 2037.01 | 0.0015        |
| Sphinganine-1-phosphate | 7001.32  | 403.21  | 3957.37  | 987.11  | 6840.94  | 549.75  | 5014.79   | 567.38  | 7688.26   | 1475.71 | 0.0349        |
| Citric acid             | 21161.26 | 1323.04 | 14770.52 | 791.02  | 13846.92 | 1239.02 | 16567.89  | 1665.64 | 12980.98  | 1975.54 | 0.0043        |

  

| Day 7                   |          |         |          |         |          |         |           |         |           |         |               |
|-------------------------|----------|---------|----------|---------|----------|---------|-----------|---------|-----------|---------|---------------|
| Metabolite              | Control  | SEM     | N_0.25Gy | SEM     | N_1Gy    | SEM     | x-ray_1Gy | SEM     | x-ray_4Gy | SEM     | ANOVA p-value |
| L-Tyrosine              | 42005.70 | 2959.13 | 39545.10 | 4360.89 | 37171.23 | 8469.29 | 43822.36  | 5762.46 | 34980.42  | 7241.09 | 0.8268        |
| L-Glutamic acid         | 2243.91  | 445.63  | 2262.57  | 375.59  | 1395.63  | 245.69  | 1953.28   | 383.70  | 895.72    | 178.86  | 0.0401        |
| Taurine                 | 51643.72 | 1677.00 | 44065.05 | 1965.51 | 32328.49 | 1310.68 | 41593.23  | 3609.94 | 27298.93  | 709.36  | < 0.0001      |
| Succinic acid           | 12157.51 | 1477.66 | 11765.78 | 1840.99 | 10725.13 | 693.48  | 10464.66  | 1324.92 | 9479.68   | 1657.11 | 0.7173        |
| L-Carnitine             | 67768.78 | 3994.28 | 67378.99 | 4806.84 | 71766.52 | 2334.06 | 63993.15  | 2608.23 | 65301.36  | 4112.43 | 0.6867        |
| Pyroglutamic acid       | 3325.74  | 413.55  | 2451.42  | 352.72  | 2664.51  | 341.98  | 2342.35   | 278.05  | 1272.37   | 235.72  | 0.0037        |
| Eisosapentaenoic acid   | 5632.25  | 517.31  | 4637.31  | 582.72  | 7542.43  | 1240.34 | 3574.08   | 656.80  | 3667.64   | 378.39  | 0.0034        |
| Linoleic acid           | 7532.85  | 1537.38 | 6101.22  | 584.86  | 7577.71  | 2889.56 | 5453.58   | 1024.31 | 3730.87   | 880.20  | 0.3471        |
| Arachidonic acid_neg    | 16338.00 | 1439.90 | 15743.65 | 1714.96 | 21348.79 | 3830.68 | 15026.76  | 1473.06 | 15015.64  | 659.42  | 0.1843        |
| Arachidonic acid_pos    | 34275.43 | 2110.79 | 32604.61 | 1881.91 | 42037.61 | 4176.10 | 32455.54  | 1957.72 | 34852.65  | 1556.90 | 0.0689        |
| Uric acid               | 40326.22 | 2959.95 | 34625.43 | 3670.07 | 30143.51 | 2369.49 | 33550.18  | 3612.17 | 26259.42  | 3397.66 | 0.0628        |
| Sphinganine-1-phosphate | 6113.87  | 739.79  | 5781.12  | 543.08  | 4214.70  | 842.71  | 6603.15   | 525.30  | 5635.85   | 991.57  | 0.2907        |
| Citric acid             | 18048.36 | 769.33  | 16846.05 | 1787.00 | 15859.23 | 1882.92 | 17910.34  | 1575.76 | 13331.74  | 1596.21 | 0.2082        |

**Supplementary Table S4: Mean values of normalized relative abundance of serum lipidomics data.**

|                     |                              | Day 1      |           |            |           |            |          |            |           |            |           |               |
|---------------------|------------------------------|------------|-----------|------------|-----------|------------|----------|------------|-----------|------------|-----------|---------------|
| Metabolite          | Class                        | Control    | SEM       | N_0.25Gy   | SEM       | N_1Gy      | SEM      | x-ray_1Gy  | SEM       | x-ray_4Gy  | SEM       | ANOVA p-value |
| Linoleic acid       | Fatty acid                   | 16256.49   | 2381.21   | 12804.20   | 3531.59   | 5131.81    | 213.57   | 11404.58   | 759.43    | 9037.53    | 1852.35   | 0.0002        |
| Docosahexanoic acid | Fatty acid                   | 57419.98   | 3523.20   | 55875.61   | 9296.89   | 31698.11   | 2011.51  | 48484.36   | 2554.37   | 47309.83   | 8214.32   | 0.0036        |
| Arachidonic acid    | Fatty acid                   | 34937.51   | 3986.24   | 32325.25   | 6274.72   | 19251.23   | 1079.14  | 29305.07   | 1872.30   | 22292.79   | 2281.57   | 0.001         |
| CE(18:2)            | Cholesteryl ester            | 1271882.24 | 49002.38  | 1036686.71 | 135188.16 | 1051254.50 | 42148.57 | 1333225.18 | 40615.45  | 1297869.46 | 80423.51  | 0.0009        |
| CE(18:3)            | Cholesteryl ester            | 69635.30   | 4349.72   | 45444.99   | 11896.02  | 46321.29   | 2460.78  | 73553.68   | 5135.50   | 78147.30   | 8573.21   | 0.0008        |
| CE(20:4)            | Cholesteryl ester            | 1635493.98 | 109778.19 | 1449040.97 | 284952.61 | 1369097.79 | 71398.36 | 1828127.26 | 48628.67  | 1920138.45 | 124954.91 | 0.0019        |
| CE(20:5)            | Cholesteryl ester            | 291342.63  | 21283.42  | 180005.13  | 41217.73  | 176413.24  | 6712.33  | 325445.43  | 25396.05  | 357455.23  | 26100.59  | <0.0001       |
| CE(22:6)            | Cholesteryl ester            | 1127582.87 | 61022.14  | 811655.18  | 195714.18 | 857370.19  | 51947.66 | 1194726.85 | 74333.00  | 1550071.15 | 202170.84 | 0.0004        |
| LysoPC(18:0)        | Lysophosphatidylcholine      | 1467391.90 | 50808.70  | 1475101.18 | 218298.51 | 1093845.89 | 79460.54 | 1514379.68 | 60952.71  | 1457499.38 | 124083.36 | 0.0221        |
| LysoPC(20:1)        | Lysophosphatidylcholine      | 9613.55    | 1104.27   | 6779.92    | 2516.36   | 3208.90    | 257.03   | 9315.92    | 756.80    | 6673.30    | 1658.99   | 0.0014        |
| LysoPE(20:0)        | Lysophosphatidylethanolamine | 23537.64   | 1062.00   | 21711.10   | 3286.29   | 16282.20   | 870.99   | 22569.03   | 682.31    | 20628.74   | 1007.15   | 0.0017        |
| LysoPE(22:0)        | Lysophosphatidylethanolamine | 13632.44   | 915.16    | 14835.44   | 2134.82   | 9971.34    | 450.58   | 15547.88   | 973.35    | 11527.90   | 822.25    | 0.0007        |
| TG(52:1)            | Triacylglycerol              | 125655.38  | 54429.40  | 42767.82   | 7610.75   | 38453.84   | 3277.38  | 67599.22   | 6354.96   | 72572.52   | 13097.05  | 0.0054        |
| TG(52:3)            | Triacylglycerol              | 1502171.10 | 110539.63 | 791410.45  | 183049.80 | 781347.83  | 79611.99 | 1386672.56 | 128923.19 | 1488159.38 | 291343.41 | 0.0028        |
| TG(55:3)            | Triacylglycerol              | 53115.68   | 4063.66   | 19589.00   | 6449.04   | 17020.83   | 5525.23  | 45313.56   | 5327.27   | 44879.56   | 13093.28  | 0.0041        |
| TG(56:4)            | Triacylglycerol              | 46333.57   | 9618.87   | 12235.77   | 13493.13  | 15360.80   | 6199.85  | 60741.13   | 9799.70   | 84446.27   | 20213.83  | 0.0005        |
| TG(56:6)            | Triacylglycerol              | 288167.12  | 35723.69  | 86792.36   | 46822.13  | 98780.06   | 15107.56 | 289769.24  | 31973.81  | 380356.24  | 58804.34  | <0.0001       |
| TG(56:8)            | Triacylglycerol              | 732372.46  | 63798.43  | 273181.52  | 139439.75 | 279733.49  | 24060.26 | 689135.07  | 69695.67  | 853997.60  | 111542.41 | <0.0001       |
| TG(57:3)            | Triacylglycerol              | 379167.96  | 25297.53  | 231508.33  | 35381.46  | 218208.08  | 21539.73 | 359453.09  | 25338.32  | 362288.98  | 68240.61  | 0.0071        |
| TG(57:3)            | Triacylglycerol              | 55274.56   | 4034.58   | 29226.10   | 12931.89  | 30334.48   | 2500.89  | 55118.70   | 5444.45   | 63146.76   | 5819.32   | <0.0001       |
| TG(57:4)            | Triacylglycerol              | 338753.77  | 28731.56  | 219230.53  | 40222.88  | 206776.23  | 21747.96 | 332384.86  | 25870.32  | 319745.48  | 59725.91  | 0.0252        |
| TG(58:10)           | Triacylglycerol              | 109809.05  | 15089.12  | 27016.88   | 24629.85  | 29061.34   | 5084.13  | 101806.49  | 14870.22  | 152572.01  | 28818.37  | <0.0001       |
| TG(58:10)           | Triacylglycerol              | 33357.70   | 4933.17   | 4526.26    | 8208.95   | 4131.13    | 1524.00  | 33691.04   | 5983.39   | 47419.59   | 10334.69  | <0.0001       |
| TG(58:3)            | Triacylglycerol              | 118509.94  | 9123.77   | 61862.64   | 13134.85  | 61477.03   | 8616.63  | 112063.17  | 9769.78   | 117121.96  | 24875.19  | 0.0054        |
| TG(58:4)            | Triacylglycerol              | 108601.49  | 12533.56  | 58204.66   | 15775.12  | 56899.72   | 7425.11  | 102195.55  | 9731.24   | 106164.05  | 23508.84  | 0.0183        |
| TG(58:8)            | Triacylglycerol              | 107989.99  | 18769.20  | 24780.81   | 18544.82  | 35723.82   | 5325.40  | 100827.61  | 9615.80   | 156556.30  | 33998.32  | 0.0001        |
| TG(58:9)            | Triacylglycerol              | 218515.66  | 26302.60  | 52241.90   | 40462.42  | 58352.63   | 10481.51 | 190860.58  | 25548.27  | 289188.96  | 51524.32  | <0.0001       |
| TG(59:3)            | Triacylglycerol              | 96959.22   | 5312.71   | 46065.37   | 10738.08  | 45343.84   | 6216.05  | 78189.52   | 6458.47   | 97527.73   | 17554.98  | 0.0004        |
| TG(61:8)            | Triacylglycerol              | 65772.64   | 8682.95   | 13282.15   | 18672.56  | 12768.43   | 2639.95  | 68992.21   | 9304.48   | 84325.82   | 16766.74  | <0.0001       |

  

|                     |                              | Day 7      |           |            |           |            |           |            |           |            |           |               |
|---------------------|------------------------------|------------|-----------|------------|-----------|------------|-----------|------------|-----------|------------|-----------|---------------|
| Metabolite          | Class                        | Control    | SEM       | N_0.25Gy   | SEM       | N_1Gy      | SEM       | x-ray_1Gy  | SEM       | x-ray_4Gy  | SEM       | ANOVA p-value |
| Linoleic acid       | Fatty acid                   | 31636.92   | 7035.91   | 20534.33   | 665.03    | 23594.15   | 9060.20   | 14355.08   | 1435.20   | 14849.82   | 3372.19   | 0.1445        |
| Docosahexanoic acid | Fatty acid                   | 94345.60   | 7620.19   | 75482.58   | 3502.47   | 86975.67   | 16594.89  | 66071.09   | 4133.73   | 66874.04   | 4819.88   | 0.1293        |
| Arachidonic acid    | Fatty acid                   | 46260.16   | 4176.12   | 42143.03   | 3167.64   | 43463.55   | 6379.70   | 36237.68   | 4511.89   | 40907.65   | 1016.33   | 0.6407        |
| CE(18:2)            | Cholesteryl ester            | 1687447.60 | 220106.76 | 1406673.52 | 62576.76  | 1424878.83 | 78857.67  | 1793021.10 | 185012.08 | 1237049.46 | 46138.14  | 0.0994        |
| CE(18:3)            | Cholesteryl ester            | 106800.46  | 15960.26  | 88171.98   | 7988.85   | 89084.15   | 4275.57   | 125150.43  | 11664.51  | 72161.42   | 2544.53   | 0.0138        |
| CE(20:4)            | Cholesteryl ester            | 2573105.44 | 271762.78 | 2342798.73 | 126248.56 | 2410951.73 | 159599.45 | 3093880.83 | 216382.47 | 2065985.85 | 114540.84 | 0.0359        |
| CE(20:5)            | Cholesteryl ester            | 408017.66  | 46314.99  | 341297.75  | 23141.60  | 442959.40  | 27782.59  | 490059.97  | 65823.05  | 306625.84  | 19481.51  | 0.0502        |
| CE(22:6)            | Cholesteryl ester            | 1881823.27 | 266458.95 | 1456467.59 | 84961.99  | 1448650.74 | 61719.05  | 2220982.95 | 249740.52 | 1511520.94 | 101826.14 | 0.0511        |
| LysoPC(18:0)        | Lysophosphatidylcholine      | 2236752.08 | 96480.98  | 1974248.46 | 138701.31 | 2052131.15 | 150303.83 | 1563354.74 | 156484.10 | 1653412.81 | 126369.91 | 0.0221        |
| LysoPC(20:1)        | Lysophosphatidylcholine      | 14704.30   | 1144.19   | 15859.02   | 910.59    | 14689.52   | 2010.17   | 11001.71   | 2539.61   | 9687.64    | 1600.58   | 0.0904        |
| LysoPE(20:0)        | Lysophosphatidylethanolamine | 30955.81   | 1300.44   | 28504.18   | 2000.28   | 30235.25   | 2807.04   | 24464.36   | 2573.47   | 26995.04   | 3263.03   | 0.4682        |
| LysoPE(22:0)        | Lysophosphatidylethanolamine | 20782.83   | 1060.80   | 17785.23   | 1218.79   | 16036.25   | 1118.21   | 13578.15   | 1836.97   | 13443.44   | 1029.69   | 0.0083        |
| TG(52:1)            | Triacylglycerol              | 52815.01   | 9231.39   | 54319.71   | 3965.75   | 74306.95   | 7518.02   | 83764.99   | 12153.41  | 104456.86  | 6913.69   | 0.0024        |
| TG(52:3)            | Triacylglycerol              | 1187187.19 | 165005.04 | 1281959.80 | 93410.45  | 2084986.98 | 224484.57 | 1560449.29 | 181981.55 | 2103365.32 | 72037.55  | 0.0014        |
| TG(55:3)            | Triacylglycerol              | 36257.89   | 9574.74   | 42500.16   | 5417.52   | 79300.20   | 10284.49  | 46697.18   | 6583.93   | 62184.46   | 1367.81   | 0.0037        |
| TG(56:4)            | Triacylglycerol              | 39860.21   | 7817.20   | 47181.89   | 2378.84   | 82269.17   | 9682.71   | 84409.50   | 21763.24  | 145467.98  | 24896.38  | 0.0022        |
| TG(56:6)            | Triacylglycerol              | 259420.98  | 33778.55  | 276134.37  | 16759.10  | 483899.03  | 41335.88  | 378187.63  | 49552.43  | 541404.80  | 48798.18  | 0.0004        |
| TG(56:8)            | Triacylglycerol              | 847178.67  | 95561.92  | 839183.89  | 33307.28  | 1306647.22 | 100365.31 | 1111601.37 | 128107.71 | 1374356.75 | 138036.63 | 0.0153        |
| TG(57:3)            | Triacylglycerol              | 289023.63  | 34167.02  | 317127.83  | 22981.62  | 492450.47  | 49348.13  | 366112.29  | 34004.10  | 482011.33  | 13521.91  | 0.0007        |
| TG(57:3)            | Triacylglycerol              | 75402.07   | 20907.08  | 62028.90   | 4814.24   | 63738.29   | 4426.45   | 124908.02  | 12588.92  | 77910.45   | 7354.49   | 0.0216        |
| TG(57:4)            | Triacylglycerol              | 307537.93  | 34018.46  | 316330.63  | 30111.06  | 431356.44  | 30811.86  | 322944.18  | 31487.07  | 395181.16  | 13652.79  | 0.0513        |
| TG(58:10)           | Triacylglycerol              | 128638.33  | 18945.81  | 130561.31  | 6670.55   | 199375.93  | 11296.45  | 176902.58  | 22078.39  | 245091.04  | 30904.54  | 0.0081        |
| TG(58:10)           | Triacylglycerol              | 33709.82   | 7658.00   | 34256.94   | 943.89    | 74852.84   | 6734.62   | 59370.82   | 10559.77  | 72304.26   | 6131.95   | 0.0023        |
| TG(58:3)            | Triacylglycerol              | 88509.02   | 13061.04  | 96518.59   | 8602.93   | 159651.50  | 17462.09  | 118926.39  | 12739.01  | 158369.25  | 4831.77   | 0.0009        |
| TG(58:4)            | Triacylglycerol              | 93760.11   | 12641.95  | 98859.53   | 11256.66  | 146399.66  | 12438.38  | 108930.02  | 14023.09  | 138307.25  | 4835.60   | 0.0282        |
| TG(58:8)            | Triacylglycerol              | 94617.62   | 12874.04  | 104864.96  | 3122.11   | 184842.52  | 7719.59   | 169779.60  | 20850.41  | 222271.32  | 26795.52  | 0.0003        |
| TG(58:9)            | Triacylglycerol              | 222184.27  | 31224.53  | 224954.60  | 11594.76  | 386317.51  | 28910.24  | 340849.34  | 42814.44  | 490939.48  | 62996.61  | 0.0012        |
| TG(59:3)            | Triacylglycerol              | 61561.55   | 9689.99   | 65222.07   | 6137.28   | 101969.30  | 7465.37   | 102127.40  | 13098.80  | 146017.83  | 8268.09   | <0.0001       |
| TG(61:8)            | Triacylglycerol              | 97363.05   | 16070.06  | 90483.98   | 4616.75   | 154060.76  | 14063.73  | 123857.62  | 17378.36  | 152518.42  | 16710.30  | 0.0508        |

**Supplementary Table S5: AUC values of each metabolite from individual ROC curves**

|                                        | <b>Day1</b> |                | <b>Day7</b> |                |
|----------------------------------------|-------------|----------------|-------------|----------------|
|                                        | <b>AUC</b>  | <b>p-value</b> | <b>AUC</b>  | <b>p-value</b> |
| <b>Urine metabolomics</b>              |             |                |             |                |
| L-Phenylalanine                        | 1.00        | 0.0022         | 0.73        | 0.28           |
| N-Decanoylglycine                      | 1.00        | 0.0003         | 0.73        | 0.13           |
| Phenylpyruvic acid                     | 0.83        | 0.04           | 1.00        | 0.0003         |
| Sebacic acid                           | 0.72        | 0.26           | 0.97        | 0.003          |
| Xanthurenic acid                       | 0.56        | 0.93           | 1.00        | 0.001          |
| Decanoylcarnitine                      | 0.53        | 0.86           | 0.90        | 0.02           |
| <b>Serum (metabolomics+lipidomics)</b> |             |                |             |                |
| Linoleic acid                          | 1.00        | 0.0013         | 0.57        | 0.47           |
| Uric acid                              | 1.00        | 0.0008         | 0.60        | 0.47           |
| Eisosapentaenoic acid                  | 1.00        | 0.0002         | 0.97        | 0.02           |
| Linoleic acid_LD                       | 1.00        | 0.00001        | 0.60        | 0.30           |
| Docosahexanoic acid                    | 1.00        | 0.0004         | 0.70        | 0.21           |
| Arachidonic acid_LD                    | 1.00        | 0.0009         | 0.70        | 0.37           |
| LysoPC180                              | 1.00        | 0.0018         | 0.83        | 0.05           |
| LysoPC201                              | 1.00        | 0.00002        | 0.67        | 0.30           |
| LysoPE200                              | 1.00        | 0.0002         | 0.73        | 0.16           |
| LysoPE220                              | 1.00        | 0.0004         | 0.70        | 0.31           |
| Uridine                                | 0.97        | 0.001          | 0.57        | 0.97           |
| L-Carnitine                            | 0.94        | 0.003          | 0.83        | 0.06           |
| Arachidonic acid_pos                   | 0.92        | 0.014          | 0.80        | 0.05           |
| Pyroglutamic acid                      | 0.89        | 0.025          | 0.57        | 0.48           |
| Taurine                                | 0.86        | 0.047          | 0.83        | 0.05           |
| Succinic acid                          | 0.86        | 0.009          | 0.57        | 0.87           |
| Sphinganine-1-phosphate                | 0.83        | 0.04           | 0.87        | 0.03           |
| L-Tyrosine                             | 0.83        | 0.03           | 0.83        | 0.52           |
| L-Glutamic acid                        | 0.78        | 0.09           | 0.67        | 0.27           |
| Arachidonic acid_neg                   | 0.78        | 0.13           | 0.73        | 0.13           |
| Citric acid                            | 0.64        | 0.22           | 0.67        | 0.42           |
